# Supplementary material for: Associations of subclinical heart failure and atrial fibrillation with mild cognitive impairment: a cross-sectional study in a subclinical heart failure screening programme
Source: HighWire-hosted journal article supplement (doi:10.1136/bmjopen-2020-045896), 2021-07-01
Supplement: bmjopen-2020-045896supp001_data_supplement.pdf [file bmjopen-2020-045896supp001_data_supplement.pdf]

**MONTREAL COGNITIVE ASSESSMENT (MOCA)**  
Version 7.1 Original Version

NAME :  
Education :  
Sex :

Date of birth :  
DATE :

|                                                                                    |  |                                                                                                                          |  |                                                                                                                            |                                            |                                                                                  |       |                          |                              |                            |       |                          |    |                          |  |     |  |                          |  |       |  |                          |  |      |  |       |  |
|------------------------------------------------------------------------------------|--|--------------------------------------------------------------------------------------------------------------------------|--|----------------------------------------------------------------------------------------------------------------------------|--------------------------------------------|----------------------------------------------------------------------------------|-------|--------------------------|------------------------------|----------------------------|-------|--------------------------|----|--------------------------|--|-----|--|--------------------------|--|-------|--|--------------------------|--|------|--|-------|--|
| <b>VISUOSPATIAL / EXECUTIVE</b>                                                    |  | 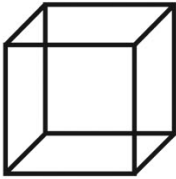                                        |  | Copy cube                                                                                                                  | Draw CLOCK (Ten past eleven)<br>(3 points) | POINTS                                                                           |       |                          |                              |                            |       |                          |    |                          |  |     |  |                          |  |       |  |                          |  |      |  |       |  |
|   |  | <input type="checkbox"/> <input type="checkbox"/>                                                                        |  | <input type="checkbox"/> <input type="checkbox"/> <input type="checkbox"/><br>Contour     Numbers     Hands                | ___/5                                      |                                                                                  |       |                          |                              |                            |       |                          |    |                          |  |     |  |                          |  |       |  |                          |  |      |  |       |  |
| <b>NAMING</b>                                                                      |  |                                                                                                                          |  |                                                                                                                            |                                            |                                                                                  |       |                          |                              |                            |       |                          |    |                          |  |     |  |                          |  |       |  |                          |  |      |  |       |  |
|  |  |                                        |  |                                         |                                            | <input type="checkbox"/> <input type="checkbox"/> <input type="checkbox"/> ___/3 |       |                          |                              |                            |       |                          |    |                          |  |     |  |                          |  |       |  |                          |  |      |  |       |  |
| <b>MEMORY</b>                                                                      |  | Read list of words, subject must repeat them. Do 2 trials, even if 1st trial is successful. Do a recall after 5 minutes. |  | FACE                                                                                                                       | VELVET                                     | CHURCH                                                                           | DAISY | RED                      | No points                    |                            |       |                          |    |                          |  |     |  |                          |  |       |  |                          |  |      |  |       |  |
|                                                                                    |  | 1st trial                                                                                                                |  |                                                                                                                            |                                            |                                                                                  |       |                          |                              |                            |       |                          |    |                          |  |     |  |                          |  |       |  |                          |  |      |  |       |  |
|                                                                                    |  | 2nd trial                                                                                                                |  |                                                                                                                            |                                            |                                                                                  |       |                          |                              |                            |       |                          |    |                          |  |     |  |                          |  |       |  |                          |  |      |  |       |  |
| <b>ATTENTION</b>                                                                   |  | Read list of digits (1 digit/ sec.).                                                                                     |  | Subject has to repeat them in the forward order                                                                            |                                            | <input type="checkbox"/>                                                         | 2     | 1                        | 8                            | 5                          | 4     |                          |    |                          |  |     |  |                          |  |       |  |                          |  |      |  |       |  |
|                                                                                    |  |                                                                                                                          |  | Subject has to repeat them in the backward order                                                                           |                                            | <input type="checkbox"/>                                                         | 7     | 4                        | 2                            |                            |       | ___/2                    |    |                          |  |     |  |                          |  |       |  |                          |  |      |  |       |  |
|                                                                                    |  | Read list of letters. The subject must tap with his hand at each letter A. No points if ≥ 2 errors                       |  | <input type="checkbox"/>                                                                                                   |                                            | F B A C M N A A J K L B A F A K D E A A A J A M O F A A B                        |       |                          |                              |                            |       | ___/1                    |    |                          |  |     |  |                          |  |       |  |                          |  |      |  |       |  |
|                                                                                    |  | Serial 7 subtraction starting at 100                                                                                     |  | <input type="checkbox"/>                                                                                                   | 93                                         | <input type="checkbox"/>                                                         | 86    | <input type="checkbox"/> | 79                           | <input type="checkbox"/>   | 72    | <input type="checkbox"/> | 65 | ___/3                    |  |     |  |                          |  |       |  |                          |  |      |  |       |  |
|                                                                                    |  |                                                                                                                          |  | 4 or 5 correct subtractions: <b>3 pts</b> , 2 or 3 correct: <b>2 pts</b> , 1 correct: <b>1 pt</b> , 0 correct: <b>0 pt</b> |                                            |                                                                                  |       |                          |                              |                            |       |                          |    |                          |  |     |  |                          |  |       |  |                          |  |      |  |       |  |
| <b>LANGUAGE</b>                                                                    |  | Repeat : I only know that John is the one to help today. <input type="checkbox"/>                                        |  | The cat always hid under the couch when dogs were in the room. <input type="checkbox"/>                                    |                                            |                                                                                  |       |                          |                              |                            |       | ___/2                    |    |                          |  |     |  |                          |  |       |  |                          |  |      |  |       |  |
|                                                                                    |  | Fluency / Name maximum number of words in one minute that begin with the letter F                                        |  | <input type="checkbox"/>                                                                                                   |                                            | _____ (N ≥ 11 words)                                                             |       |                          |                              |                            |       | ___/1                    |    |                          |  |     |  |                          |  |       |  |                          |  |      |  |       |  |
| <b>ABSTRACTION</b>                                                                 |  | Similarity between e.g. banana - orange = fruit                                                                          |  | <input type="checkbox"/>                                                                                                   |                                            | train - bicycle                                                                  |       | <input type="checkbox"/> |                              | watch - ruler              |       | ___/2                    |    |                          |  |     |  |                          |  |       |  |                          |  |      |  |       |  |
| <b>DELAYED RECALL</b>                                                              |  | Has to recall words WITH NO CUE                                                                                          |  | FACE                                                                                                                       | VELVET                                     | CHURCH                                                                           | DAISY | RED                      | Points for UNCUE recall only |                            | ___/5 |                          |    |                          |  |     |  |                          |  |       |  |                          |  |      |  |       |  |
|                                                                                    |  | Category cue                                                                                                             |  |                                                                                                                            |                                            |                                                                                  |       |                          |                              |                            |       |                          |    |                          |  |     |  |                          |  |       |  |                          |  |      |  |       |  |
| <b>Optional</b>                                                                    |  | Multiple choice cue                                                                                                      |  |                                                                                                                            |                                            |                                                                                  |       |                          |                              |                            |       |                          |    |                          |  |     |  |                          |  |       |  |                          |  |      |  |       |  |
| <b>ORIENTATION</b>                                                                 |  | <input type="checkbox"/>                                                                                                 |  | Date                                                                                                                       |                                            | <input type="checkbox"/>                                                         |       | Month                    |                              | <input type="checkbox"/>   |       | Year                     |    | <input type="checkbox"/> |  | Day |  | <input type="checkbox"/> |  | Place |  | <input type="checkbox"/> |  | City |  | ___/6 |  |
| © Z.Nasreddine MD                                                                  |  | <a href="http://www.mocatest.org">www.mocatest.org</a>                                                                   |  | Normal ≥ 26 / 30                                                                                                           |                                            | <b>TOTAL</b>                                                                     |       | ___/30                   |                              | Add 1 point if ≤ 12 yr edu |       |                          |    |                          |  |     |  |                          |  |       |  |                          |  |      |  |       |  |
| Administered by: _____                                                             |  |                                                                                                                          |  |                                                                                                                            |                                            |                                                                                  |       |                          |                              |                            |       |                          |    |                          |  |     |  |                          |  |       |  |                          |  |      |  |       |  |
